# Supplementary material for: Enhanced Photoelectrochemical Activity of TiO2 Nanotubes Decorated with Lanthanide Ions for Hydrogen Production
Source: MDPI journal article supplement (doi:10.3390/catal12080866), 2022-08-05
Supplement: s1 [file s1]

## *Supplementary Material*

# Enhanced photoelectrochemical activity of TiO<sub>2</sub> nanotubes decorated with lanthanide ions for hydrogen production

Hyekyung Cho<sup>1,2</sup>, Hyunku Joo<sup>1</sup>, Hansung Kim<sup>2</sup>, Ji-Eun Kim<sup>1,3</sup>,  
Kyoung-Soo Kang<sup>1</sup>, Hyeonmin Jung<sup>1,4</sup> and Jaekyung Yoon<sup>1,\*</sup>

<sup>1</sup> Korea Institute of Energy Research, Hydrogen Research Department, 152 Gajeong-ro, Daejeon 34129, Republic of Korea; chk2946@gmail.com (H.C); hkjoo@kier.re.kr (H.Joo); [cheeeun12@kier.re.kr](mailto:cheeeun12@kier.re.kr) (J.-E.K.); [kskang@kier.re.kr](mailto:kskang@kier.re.kr) (K.-S.K); [nbc13@kier.re.kr](mailto:nbc13@kier.re.kr) (H.Jung)<sup>2</sup>

Department of Chemical and Biomolecular Engineering, Yonsei University, 50 Yonsei-ro, Seoul 03722, Republic of Korea; elchem@yonsei.ac.kr (H.K);

<sup>3</sup> Department of Chemical and Biological Engineering, Korea University, 145 Anam-ro, Seoul 02841, Republic of Korea

<sup>4</sup> Graduate School of Energy Science and Technology, Chungnam National University, 99 Daehak-ro, Daejeon 34134, Republic of Korea

\* Correspondence: jyoona@kier.re.kr; Tel.: +82-42-860-3473

**\*Corresponding author.**

\* Dr. Jaekyung Yoon: Tel.: +82-42-860-3473; E-mail: jyoona@kier.re.kr.

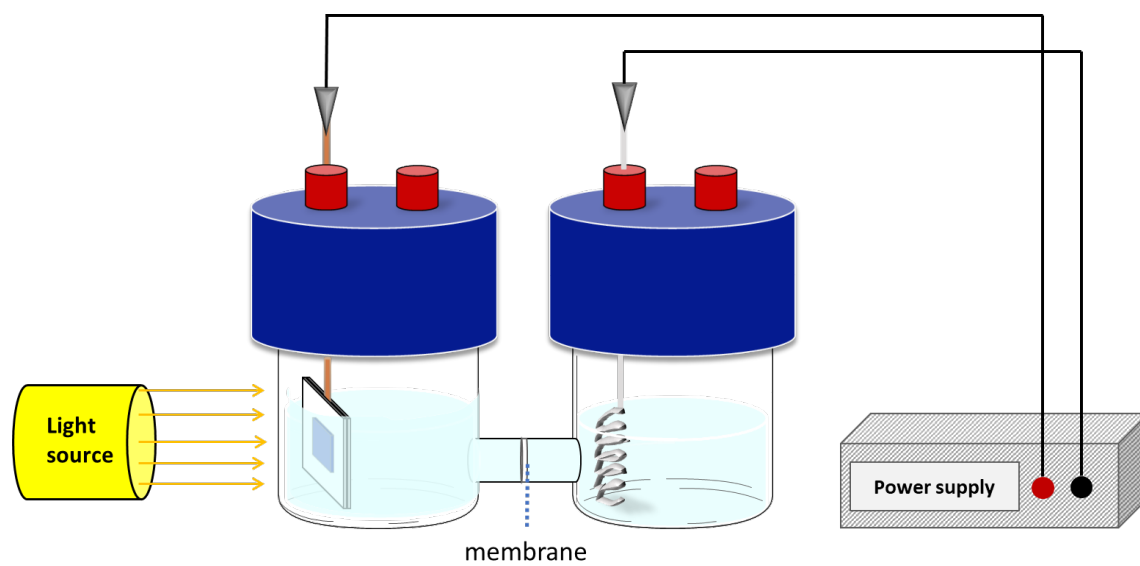

**Figure S1.** Schematic diagram of the photoelectrochemical cell.
